# Supplementary material
Source: PubMed Central journal article supplement (PMC2410076)

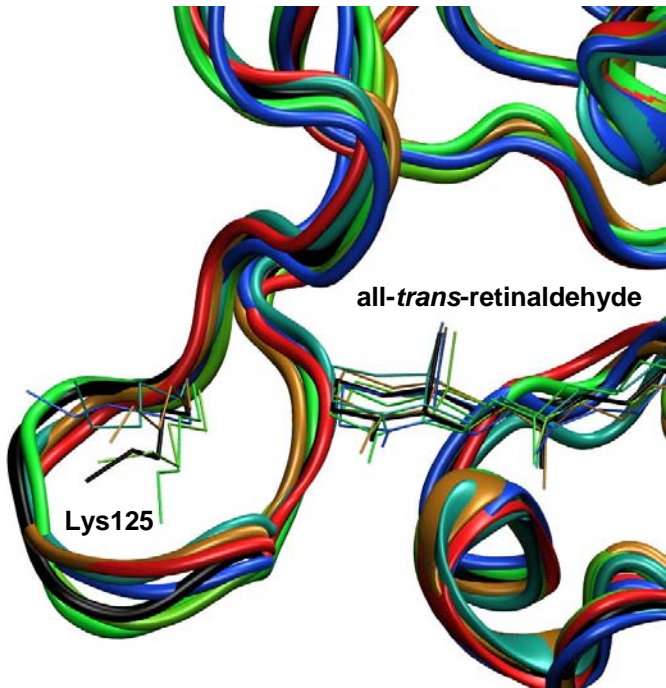

Supplement: pnas_0705659105_6.pdf [file pnas_0705659105_6.pdf]
